# Supplementary material
Source: publisher figshare collection journal article supplement (https://acs.figshare.com/ndownloader/files/14950151)
Supplement: Supplementary file 1 [file 14950151]

# Supporting Information

## Synthesis and solution self-assembly of poly(1,3-dioxolane)

Huan Qiu,<sup>†</sup> Zhening Yang,<sup>†</sup> Moritz Köhler,<sup>‡,§</sup> Jun Ling<sup>\*,†</sup>, Felix H. Schacher <sup>\*,‡,§</sup>

<sup>†</sup> MOE Key Laboratory of Macromolecular Synthesis and Functionalization, Department of Polymer Science and Engineering, Zhejiang University, Hangzhou 310027, China.

<sup>‡</sup> Institute of Organic Chemistry and Macromolecular Chemistry (IOMC), Friedrich-Schiller-University Jena, Lessingstraße 8, D-07743 Jena, Germany.

<sup>§</sup> Jena Center for Soft Matter (JCSM), Friedrich-Schiller-University Jena, Philosophenweg 7, D-07743 Jena, Germany.

<sup>\*</sup> Correspondence authors: lingjun@zju.edu.cn; felix.schacher@uni-jena.de

**Table S1.** Homopolymerization of DO by various catalysts.

| Run            | Catalyst                                      | $M_{n,SEC}$<br>(kDa) | $\bar{D}_{SEC}$ | Ref. |
|----------------|-----------------------------------------------|----------------------|-----------------|------|
| 1 <sup>a</sup> | terephthaloyl ditriflate                      | 6.7                  | 1.90            | 1    |
| 2 <sup>b</sup> |                                               | 9.7                  | 2.00            |      |
| 3 <sup>a</sup> | Maghnite-H <sup>+</sup>                       | 2.2                  | 1.52            | 2,3  |
| 4 <sup>b</sup> |                                               | 6.5                  | 2.16            |      |
| 5 <sup>a</sup> | methacrylic acid/<br>dicyclohexylcarbodiimide | 2.5                  | 1.40            | 4    |
| 6 <sup>b</sup> |                                               | 9.2                  | 2.20            |      |
| 7 <sup>a</sup> | dialkylformal                                 | 1.7                  | 1.60            | 5    |
| 8 <sup>b</sup> |                                               | 4.3                  | 1.95            |      |
| 9 <sup>b</sup> | silver hexafluoroantimonate                   | 13.5                 | 1.67            | 6    |

<sup>a</sup> Value of  $\bar{D}$  is the narrowest value in the corresponding literature examples.

<sup>b</sup> Value of  $\bar{D}$  is attributed to the polymer of the highest molecular weight.

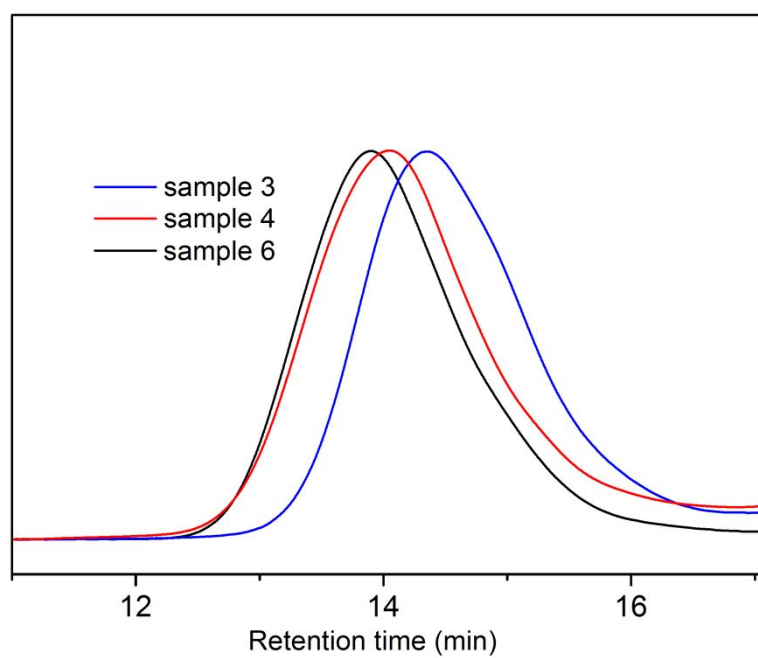

**Figure S1.** SEC elution traces of PDOs in Table 1.

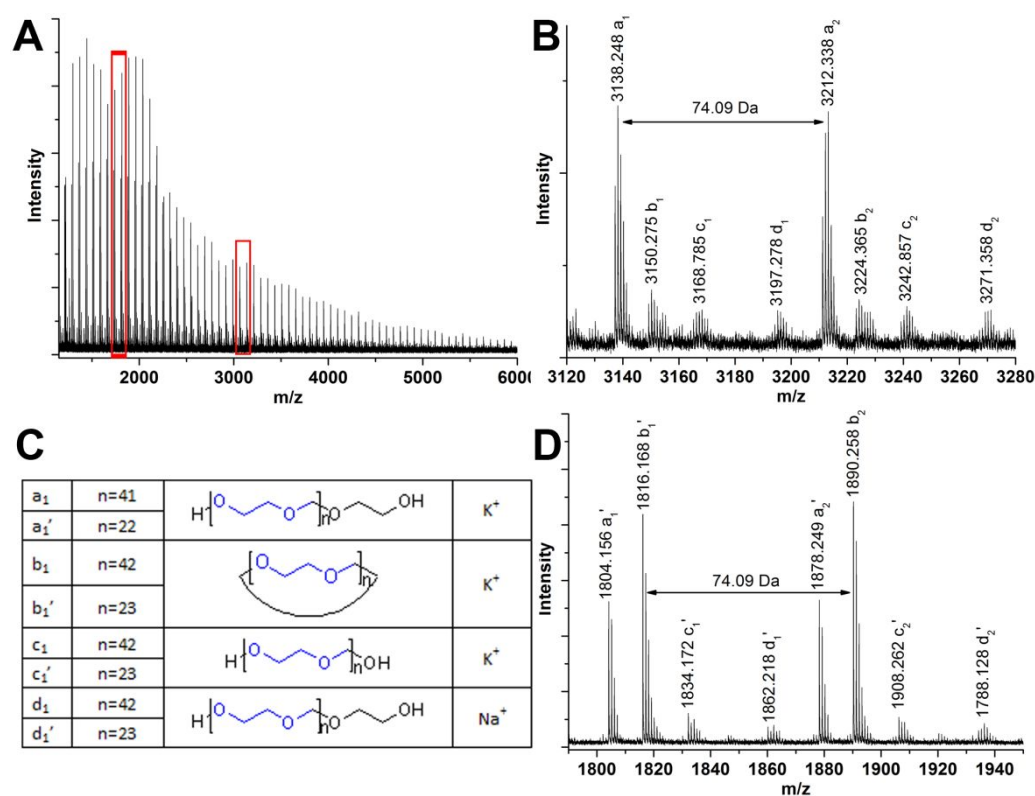

Figure S2. MALDI-ToF mass spectra of Sample 1 in Table 1 (A) with enlarged views (B & D) and the corresponding PDO structures (C). Polymers  $c_1$  ( $c_1'$ ) represent PDO terminated by water with  $K^+$ . Polymers  $a_1$  ( $a_1'$ ) and  $d_1$  ( $d_1'$ ) are PDO chains with ethyl alcohol at chain ends with  $K^+$  and  $Na^+$ , respectively which result from the degradation of formyl segments at chain ends. Polymers  $b_1$  ( $b_1'$ ) are PDO rings caused by backbiting especially in low MW regions.

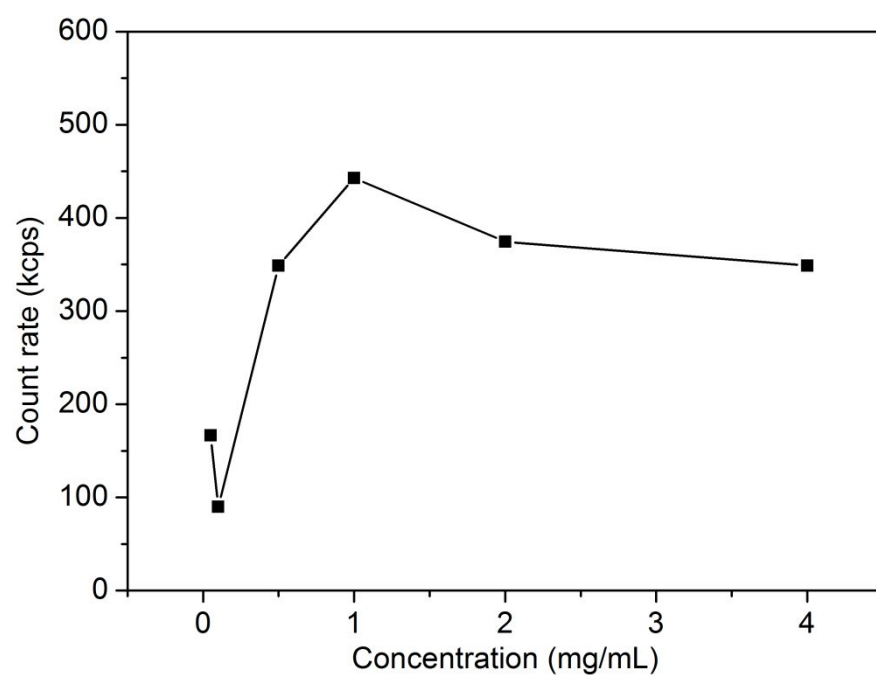

**Figure S3.** DLS count rates as a function of PDO concentration (Sample 6 in Table 1).

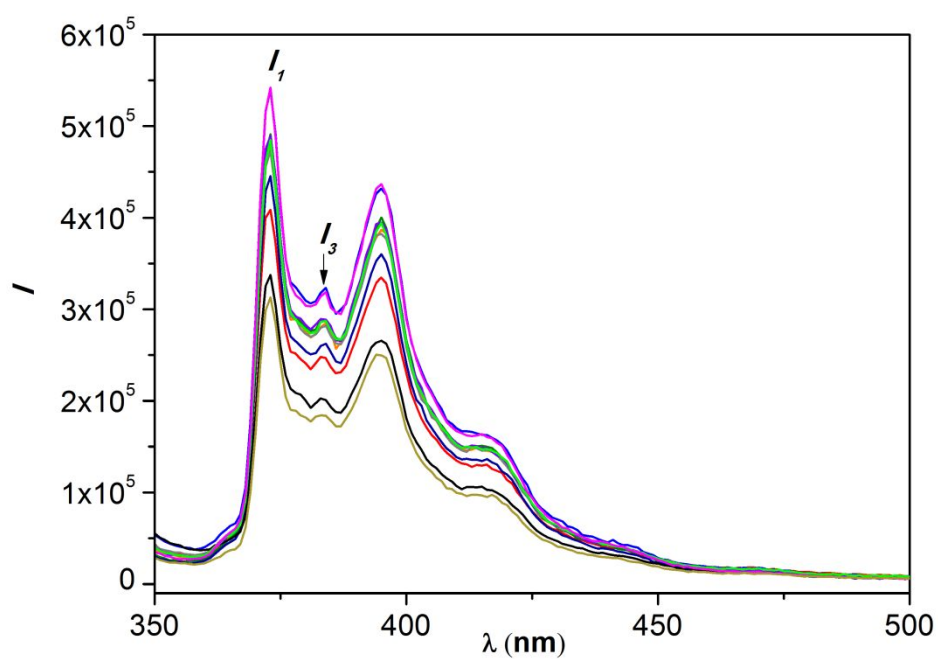

**Figure S4.** Fluorescence spectra of pyrene in the presence of PDO (Sample 6 in Table 1) at different concentrations ranging from  $5 \times 10^{-5}$  mg/mL to 0.5 mg/mL in aqueous solution.

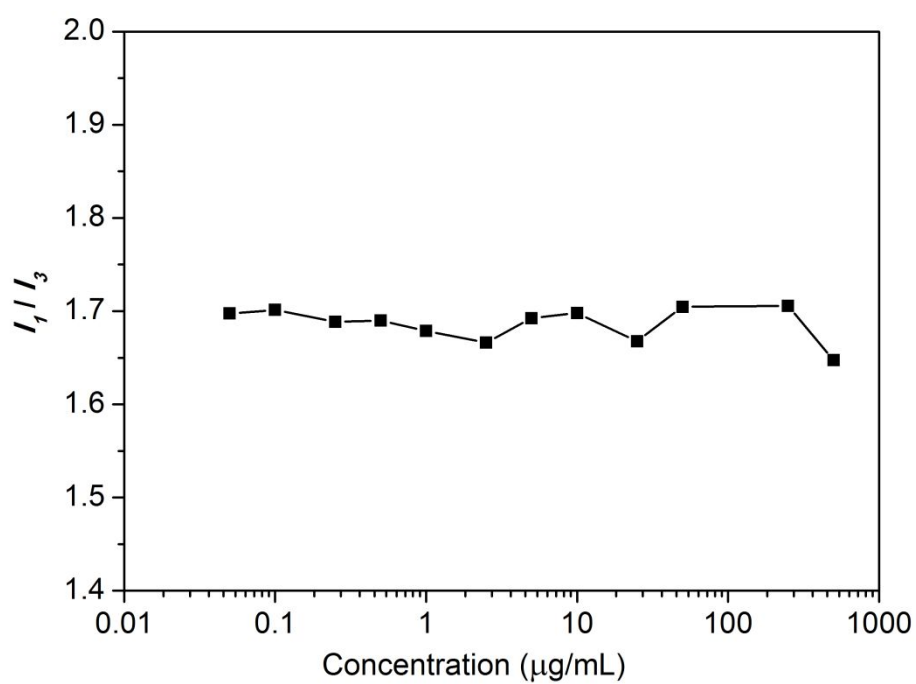

**Figure S5.** Variation in  $I_1/I_3$  for pyrene as a function of PDO concentration (Sample 6 in Table 1) ranging from  $5 \times 10^{-5}$  mg/mL to 0.5 mg/mL.

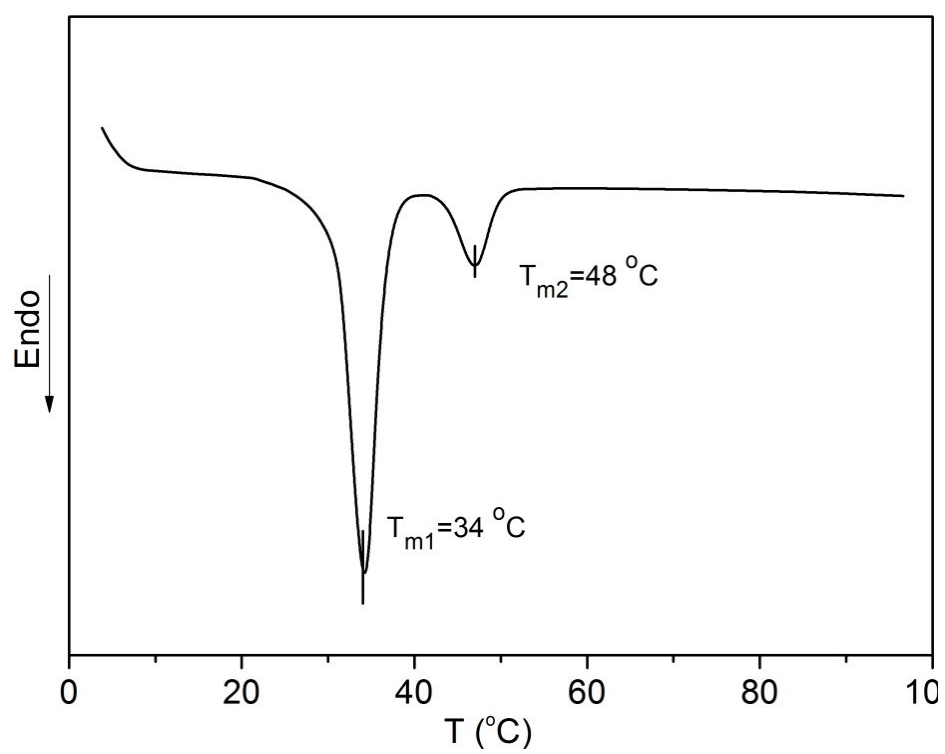

**Figure S6.** DSC thermogram of PDO (Sample 6 in Table 1).



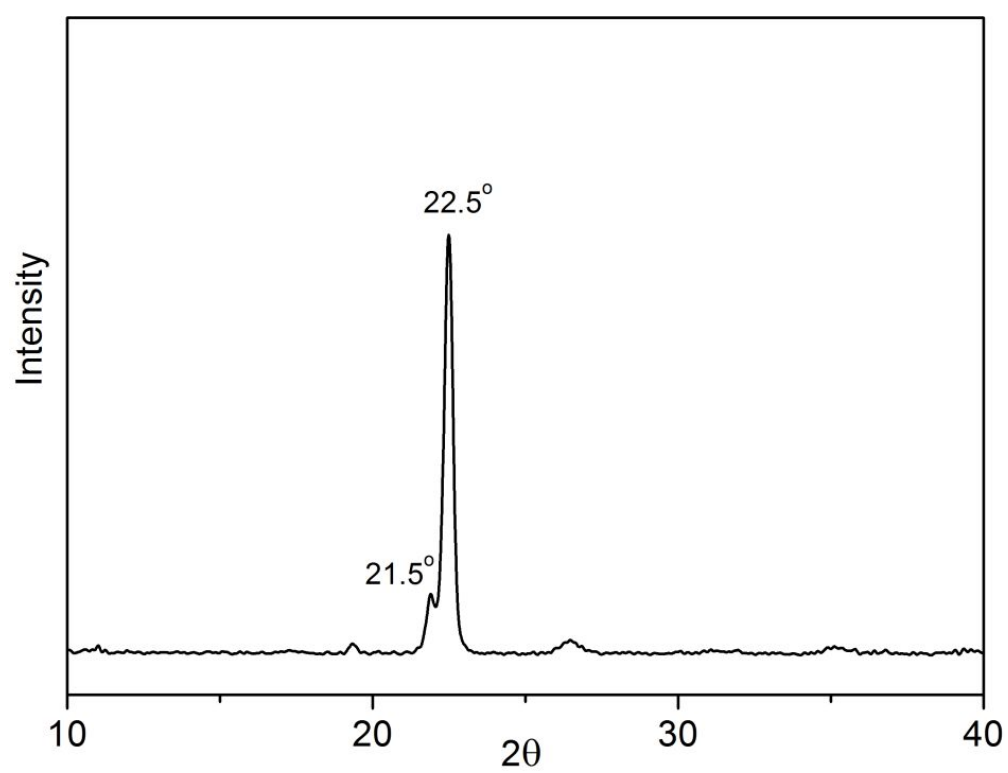

**Figure S7.** X-ray diffraction pattern of PDO (Sample 6 in Table 1).

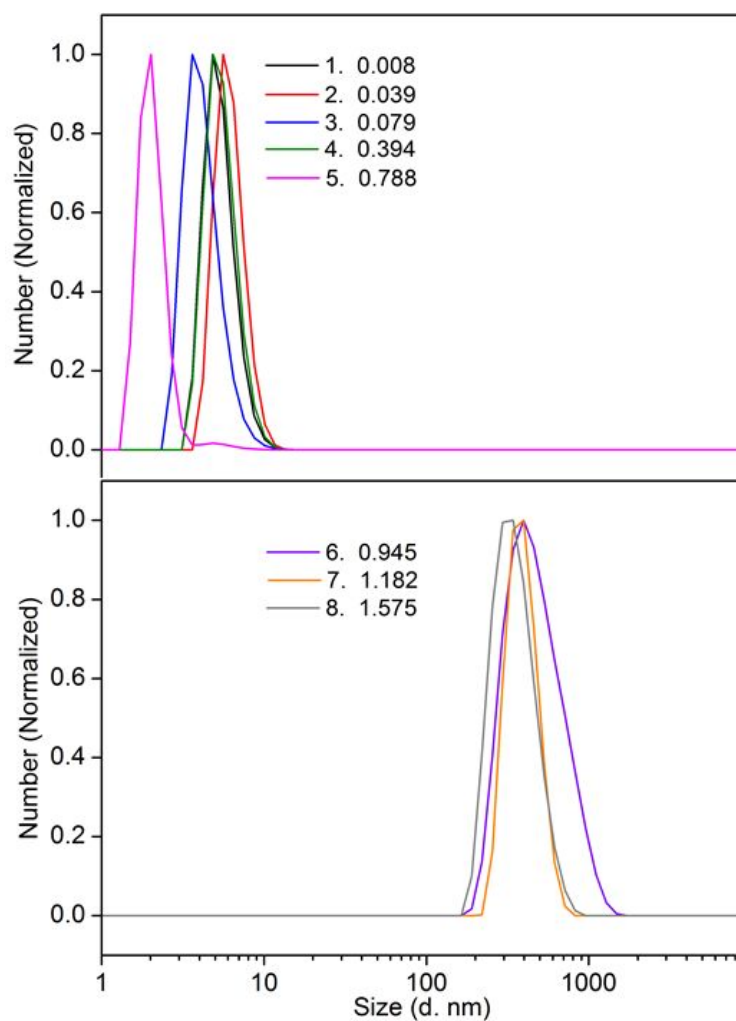

**Figure S8.** DLS CONTIN plots of PDO nanoparticles (Sample 6 in Table 1) with KOTf at different molar ratios (KOTf / units of DO) ranging from 0.008 to 1.575.

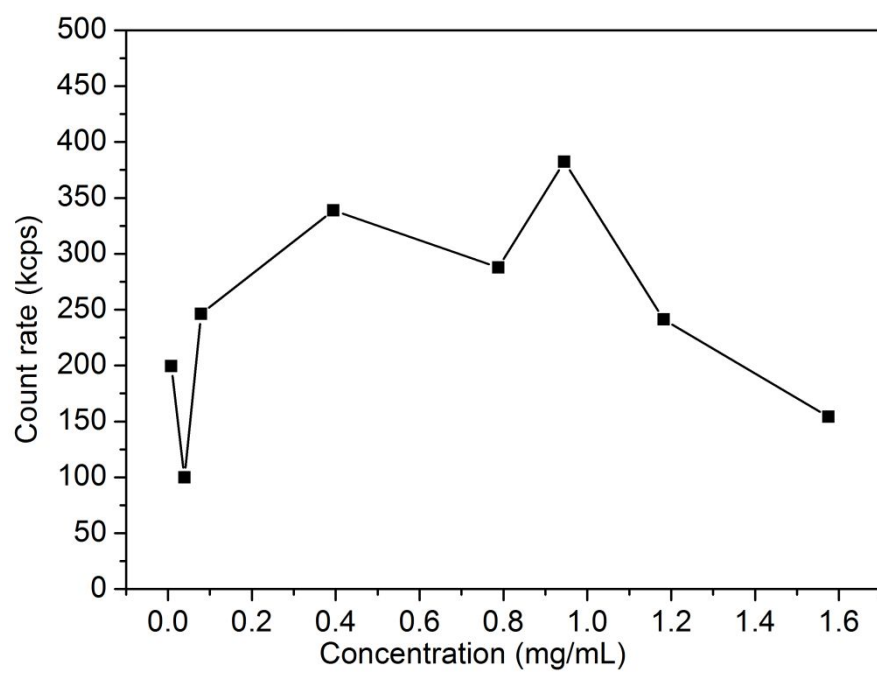

**Figure S9.** DLS count rates as a function of molar ratios (KOTf / units of DO).

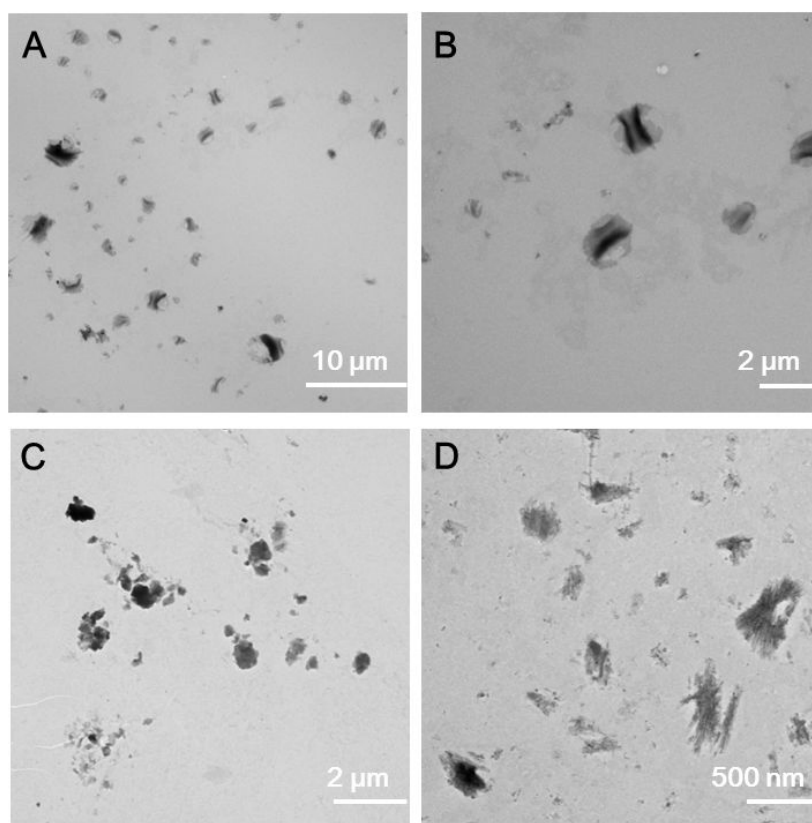

**Figure S10.** TEM micrographs of PDO nanoparticles (Sample 6 in Table 1, 5 mg/mL) in water at different molar ratios (KOTf/ units of DO): (A&B) 0.945, (C) 0.394, (D) 1.575.

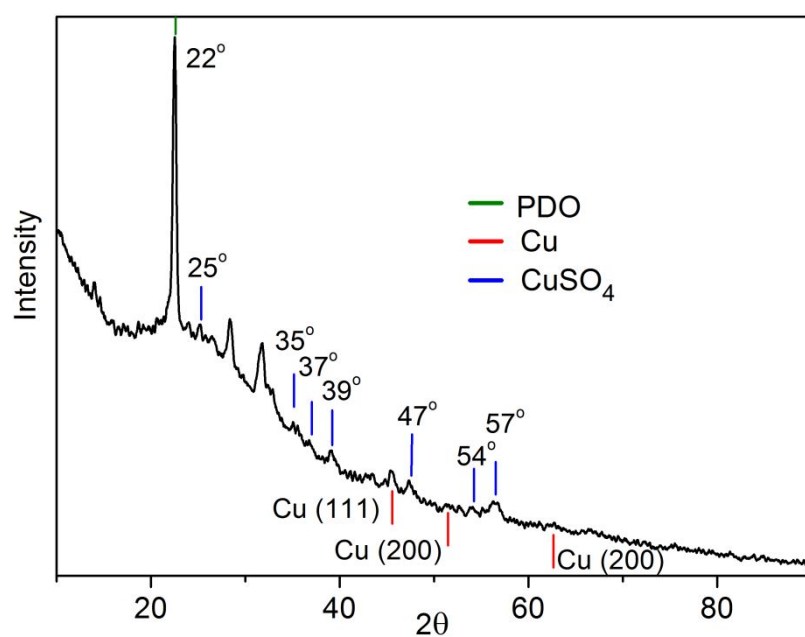

**Figure S11.** X-ray diffraction pattern of Cu/PDO/CuSO<sub>4</sub> compound (Olive, blue and red labels represent diffractions assigned to PDO, Cu and CuSO<sub>4</sub>, respectively).

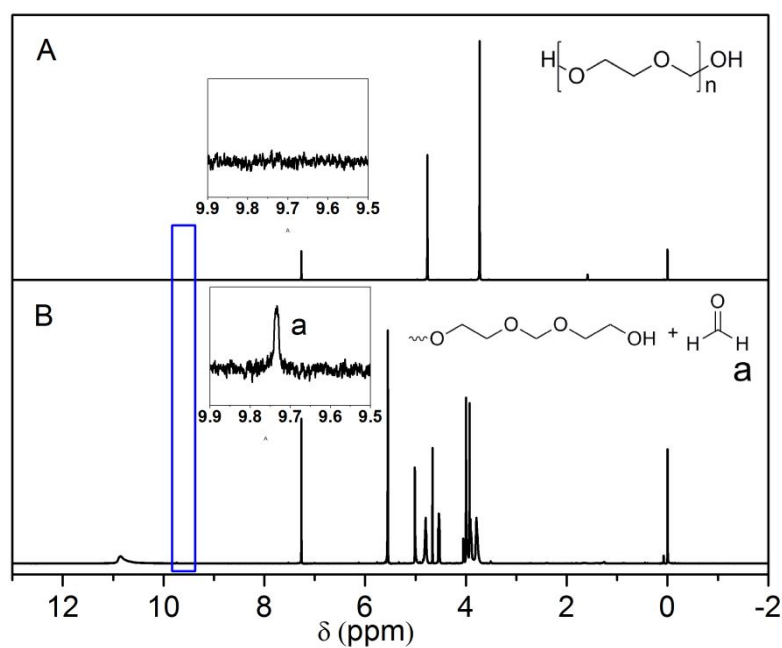

**Figure S12.**  $^1\text{H}$  NMR spectra of PDO (Sample 6 in Table 1) without TFA treatment (A) and with TFA treatment (B), including the enlarged signals of methyl aldehyde after degradation in  $\text{CDCl}_3$ .

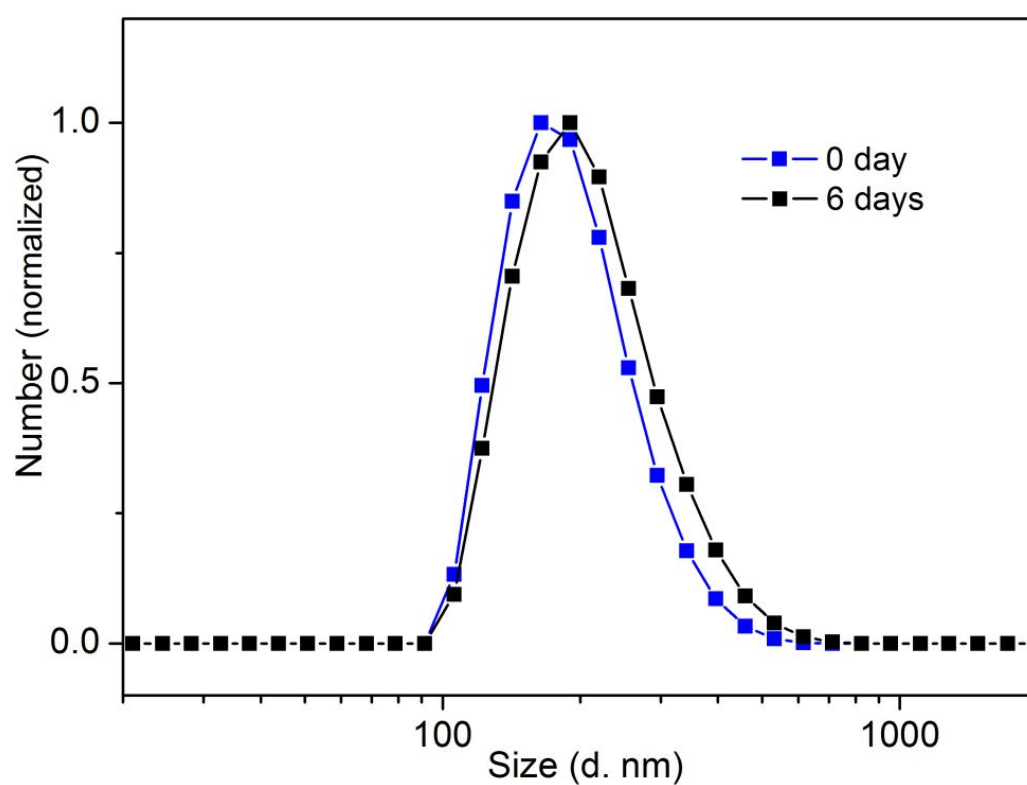

**Figure S13.** DLS size distribution histograms of nanoparticles self-assembled by PDO (Sample 6 in Table 1) in pH 6.8 buffer solution at 0.5 mg/mL 25 °C within 0 and 6 days.

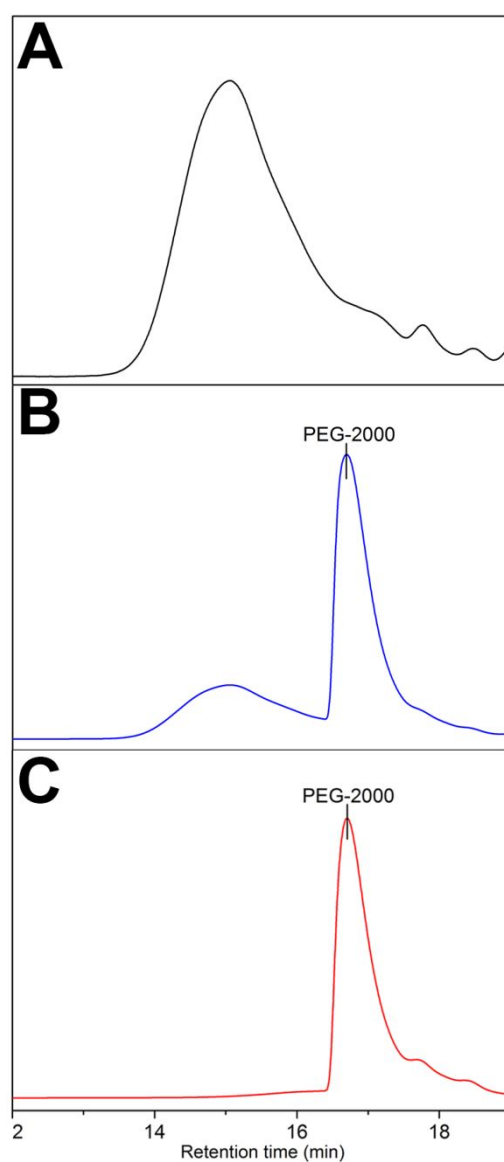

**Figure S14.** SEC elution traces of PDO (Sample 8 in Table 1, A), PDO (Sample 8 in Table 1) in buffer solution of pH 6.8 within 6 days (B) and PDO (Sample 8 in Table 1) in buffer solution of pH 5.5 within 4 days (C). PEG-2000 is used as a standard.



## References

- (1) Meirvenne, D. V.; Goethals, E. J. *Makromol. Chem. Suppl.* **1989**, *15*, 61.
- (2) Megherbi, R.; Belbachir, M.; Meghabar, R. *J. Appl. Polym. Sci.* **2006**, *101*, 78.
- (3) Reguieg, F.; Sahli, N.; Belbachir, M.; Lutz, P. J. *J. Appl. Polym. Sci.* **2006**, *99*, 3147.
- (4) Clercq, R. R. D.; Goethals, E. J. *Macromolecules* **1992**, *25*, 1109.
- (5) Sahli, N.; Belbachir, M.; Lutz, P. J. *Macromol. Chem. Phys.* **2005**, *206*, 1257.
- (6) Reibel, L. C.; Durand, C. P.; Franta, E. *Can. J. Chem.* **1985**, *63*, 264.
